# Supplementary material
Source: PubMed Central journal article supplement (PMC4042754)
Supplement: JCM.03363-13_zjm999093409so1.pdf [file JCM.03363-13_zjm999093409so1.pdf]

1 **Supplemental Material**

2 **Rapid Detection of New Delhi Metallo- $\beta$ -Lactamase Gene and Variants coding**  
3 **Carbapenemase with Different Activity by a PCR-based *in vitro* protein**  
4 **expression method**

5 Li Huang<sup>1,3</sup>, Xiumei Hu<sup>2,4</sup>, Man Zhou<sup>1</sup>, Yinmei Yang<sup>2</sup>, Jinjuan Qiao<sup>1,3</sup>, Dianbing Wang<sup>1</sup>,  
6 Junping Yu<sup>1</sup>, Zongqiang Cui<sup>1</sup>, Zhiping Zhang<sup>1</sup>, Xian-En Zhang<sup>1</sup>, Hongping Wei<sup>1\*</sup>

7 <sup>1</sup>State Key Laboratory of Virology, Wuhan Institute of Virology, Chinese Academy of  
8 Sciences, Wuhan 430071, China

9 <sup>2</sup>Department of Clinical Laboratory, Guangzhou First Municipal People's Hospital, Affiliated  
10 Hospital of Guangzhou Medical College, Guangzhou 510180, China

11 <sup>3</sup> University of Chinese Academy of Sciences, Beijing 100039, China

12 <sup>4</sup> Southern Medical University, Guangzhou, 510515, China

13

14 **Supplementary Materials and Methods**

15 **Clonal relationship of 15 *A. baumannii* isolates**

16 To test the clonship between the 15 *A. baumannii* isolates, a multilocus sequence  
17 typing (MLST) method was used to determine the sequence types (STs) the *A.*  
18 *baumannii* isolates as described. The seven housekeeping genes (*gltA*, *gyrB*, *gdhB*,  
19 *RecA*, *cpn60*, *gpi*, *rpoD*) were sequenced by BGI Tech Inc. (Wuhan, China) and  
20 analyzed using the *A. baumannii* MLST database (<http://pubmlst.org/abaumannii/>). As  
21 shown in supplementary Table S2, 8 different STs and three new STs (42, 65, 69 ABA)  
22 were found in the 15 *A. baumannii* isolates. The results were also analyzed by

23 eBURST (<http://eburst.mlst.net/default.asp>). Using group defined by 6 or more loci  
24 matches, eBURST results showed that there were 2 groups and 3 singletons in the 8  
25 STs. Compared with all the STs in the database, the ST208, ST368 and ST368 belong  
26 to group 1, in which the predicted founder was ST118 isolated from Thailand.

27

### 28 **Preparation of DNA templates of clinical isolates by heat lysis.**

29 Briefly, 1.4 mL bacteria culture (with McFarland between 3 to 4) were centrifuged  
30 first. Then the precipitates were re-suspended in 0.1 mL sterile milliQ water, and  
31 finally inactivated at 100 °C for 10 min.

32

### 33 **Long fragment real-time PCR (LF-qPCR) assay.**

34 The whole *bla*<sub>NDM-1</sub> fragments (822 bp) were amplified by LF-qPCR with primers F-rt  
35 and R-rt designed in house and shown in Table S2. The LF-qPCR was performed on a  
36 StepOnePlus<sup>TM</sup> qPCR System (Applied Biosystems Inc., USA) under the following  
37 conditions: 2 min at 98 °C and 35 cycles of 10 s at 98 °C and 75 s at 68 °C. The  
38 LF-qPCR mixture contained 10 µL MightyAmp<sup>TM</sup> (SYBR® Plus, Takara  
39 Biotechnology Co. Ltd, China), 0.2 µL primer F-rt (20 µmol/L), 0.2 µL primer R-rt  
40 (20 µmol/L), 4 µL DNA template and 5.6 µL sterile milliQ water. The threshold cycle  
41 ( $C_T$ ) values were calculated by the StepOne<sup>TM</sup> Software v2.2.2.

42 The analytical sensitivity of the LF-qPCR for *bla*<sub>NDM-1</sub> contained plasmids were  
43 determined using the plasmid solution extracted from *A. baumannii* 65. The qPCR  
44 sensitivity for bacteria suspensions was also determined by spiking different amounts

45 of *A. baumannii* 65 into water. To quantify the viable bacteria in each dilution step, a  
46 nutrient agar plate was inoculated with 100  $\mu$ L of a suspension and incubated  
47 overnight at 37 °C. The number of colonies that grew was counted on the following  
48 day. All experiments were repeated three times to determine the sensitivity and the  
49 linearity of LF-qPCR.

50

### 51 **PCR amplification for *in vitro* expression (ePCR).**

52 The ePCR is performed to add T7 promoter and 5' untranslated region (5' UTR) for *in*  
53 *vitro* expression using the primers F-1-UTR and R-1 shown in Table S2. The ePCR  
54 amplifications were conducted with an initial 30 s denaturation step at 98 °C, 37  
55 cycles of 98 °C for 30 s, 70 °C for 1 min, and 72 °C for 30 s, and a final 10 min  
56 elongation on a thermal cycler (Biometra, Germany). Each reaction tube contained 0.6  
57 U of Phusion®High-Fidelity DNA Polymerase (NEB, UK), 10  $\mu$ L 5 $\times$ GC buffer, 200  
58  $\mu$ mol/L of each dNTP, 20  $\mu$ mol/L of each primers, 4  $\mu$ L Dimethyl-sulfoxide and 3  $\mu$ L  
59 DNA template. The amplified products were analyzed by electrophoresis using 1.5%  
60 agarose gel with ethidium bromide.

61

### 62 ***In vitro* synthesis of NDM-1**

63 The amplified *bla*<sub>NDM-1</sub> DNA in the ePCR were concentrated by adding 3M  
64 CH<sub>3</sub>COONa (pH 5.2) according to a volume ratio 1:10 and 4  $\mu$ L DNAmate (Takara  
65 Biotechnology Co. Ltd, Dalian, China) first, and then by the ethanol precipitation.  
66 The concentration and the quality of the concentrated DNAs were evaluated by a

67 Nanodrop 2000 spectrophotometer (Thermo, USA). The *in vitro* synthesis of NDM-1  
68 was carried out at 24 °C for 20 h using RTS<sup>TM</sup> 100 Wheat Germ CECF Kit (5 Prime  
69 Inc., USA) following the procedures suggested by the manufacturer. An equal amount  
70 of the Wheat Germ lysate without adding the ePCR amplicon was also incubated  
71 simultaneously as the negative control.

72

### 73 **Antibiotic degradation assay**

74 After *in vitro* synthesis of NDM-1, 3 µL of the lysates were mixed with 297 µL of 50  
75 mmol/L HEPES buffer (containing 100 µmol/L imipenem and 1 µmol/L ZnSO<sub>4</sub>, pH  
76 7.5) at 30 °C, respectively. Measurements of NDM-1 activities were performed on a  
77 Synergy H1 Hybrid Reader (BioTek, USA) by observing the decrease in absorption at  
78 300 nm. The inhibition assays were performed by pre-incubating the lysates with  
79 EDTA for 2 min at the 25 °C before addition of the imipenem contained HEPES  
80 buffer, as described previously. All experiments were repeated three times

81

82 **Tables**

83

84 **TABLE S1** Information of clinical samples.

| Sample no.       | Strain                  | Isolated from | Isolated time |
|------------------|-------------------------|---------------|---------------|
| Negative control | <i>E. coli</i> 53       | urine         | 2009/5/3      |
| Positive control | <i>A. baumannii</i> 65  | sputum        | 2010/7/20     |
| 1                | <i>E. coli</i> 23       | urine         | 2008/3/5      |
| 2                | <i>E. coli</i> 59       | ascites       | 2009/8/1      |
| 3                | <i>E. coli</i> 75       | urine         | 2008/12/12    |
| 4                | <i>K. pneumoniae</i> 17 | sputum        | 2011/11/17    |
| 5                | <i>K. pneumoniae</i> 19 | sputum        | 2009/2/24     |
| 6                | <i>K. pneumoniae</i> 76 | -             | 2007          |
| 7                | <i>E. cloacae</i> 60    | sputum        | 2009/1/12     |
| 8                | <i>E. cloacae</i> 63    | sputum        | 2009/3/4      |
| 9                | <i>K. ozaenae</i> 16    | urine         | 2008/12/12    |
| 10               | <i>A. baumannii</i> 26  | sputum        | 2009/10/22    |
| 11               | <i>A. baumannii</i> 30  | sputum        | 2009/2/2      |
| 12               | <i>A. baumannii</i> 31  | sputum        | 2011/11/17    |
| 13               | <i>A. baumannii</i> 33  | sputum        | 2009/4/29     |
| 14               | <i>A. baumannii</i> 39  | sputum        | 2009/7/29     |
| 15               | <i>A. baumannii</i> 40  | trachea       | 2010/3/9      |
| 16               | <i>A. baumannii</i> 41  | sputum        | 2010/3/1      |
| 17               | <i>A. baumannii</i> 42  | trachea       | 2010/6/3      |
| 18               | <i>A. baumannii</i> 59  | sputum        | 2009/12/1     |
| 19               | <i>A. baumannii</i> 62  | sputum        | 2010/1/20     |
| 20               | <i>A. baumannii</i> 63  | trachea       | 2010/1/20     |
| 21               | <i>A. baumannii</i> 66  | sputum        | 2010/9/8      |
| 22               | <i>A. baumannii</i> 69  | ascites       | 2010/6/14     |
| 23               | <i>A. baumannii</i> 70  | sputum        | 2008/8/2      |

85

86 **TABLE S2** Results of MLST.

| Strain no. | Allele no.  |             |             |             |              |            |             | ST  |
|------------|-------------|-------------|-------------|-------------|--------------|------------|-------------|-----|
|            | <i>gtlA</i> | <i>gyrB</i> | <i>gdhB</i> | <i>recA</i> | <i>cpn60</i> | <i>gpi</i> | <i>rpoD</i> |     |
| 26         | 21          | 15          | 3           | 2           | 35           | 111        | 4           | 254 |
| 30         | 21          | 15          | 3           | 2           | 35           | 111        | 4           | 254 |
| 31         | 21          | 15          | 3           | 2           | 35           | 111        | 4           | 254 |
| 33         | 21          | 15          | 3           | 2           | 35           | 111        | 4           | 254 |
| 39         | 21          | 15          | 3           | 2           | 35           | 111        | 4           | 254 |
| 40         | 21          | 15          | 3           | 2           | 35           | 111        | 4           | 254 |
| 41         | 21          | 15          | 3           | 2           | 35           | 111        | 4           | 254 |
| 42         | 21          | 15          | 3           | 49          | 35           | 111        | 4           | new |
| 59         | 1           | 3           | 3           | 2           | 2            | 97         | 3           | 208 |
| 62         | 1           | 3           | 3           | 2           | 2            | 97         | 3           | 208 |
| 63         | 34          | 81          | 3           | 2           | 2            | 16         | 3           | 381 |
| 65         | 9           | 3           | 34          | 2           | 39           | 125        | 20          | new |
| 66         | 1           | 3           | 3           | 2           | 2            | 140        | 3           | 368 |
| 69         | 1           | 15          | 3           | 7           | 39           | 111        | 22          | new |
| 70         | 1           | 15          | 2           | 28          | 1            | 107        | 32          | 229 |

87

88 **TABLE S3** Primer sequences used for amplification of the *bla*<sub>N<sub>DM-1</sub></sub> gene and  
 89 construction of *bla*<sub>N<sub>DM-1</sub></sub> variants.

|                        | Primers               | Sequence (5'- 3')                                                                    |
|------------------------|-----------------------|--------------------------------------------------------------------------------------|
| <b>LF-qPCR</b>         | F-rt                  | AAACTTGATGGAATTGCCCA                                                                 |
|                        | R-rt                  | GCTCAGCGCAGCTTGTC                                                                    |
| <b>ePCR</b>            | F-rt-UTR <sup>a</sup> | <b>TAATACGACTCACTATAGGATACTCCCCACAACAGCTTACAATACTCCCCAAA</b><br>CTTGATGGAATTGCCCA    |
|                        | F-1-UTR <sup>a</sup>  | <b>TAATACGACTCACTATAGGATACTCCCCACAACAGCTTACAATACTCCCCATGG</b><br>AATTGCCCAATATTATGCA |
| <b>PCR<sup>b</sup></b> | R-1                   | TCAGCGCAGCTTGTTCGGCCATGC                                                             |
|                        | F-38                  | GGCGGAATGGCTCATCACGA                                                                 |
|                        | R-344                 | CGCAACACAGCCTGACTTTC                                                                 |
|                        | Pre-A                 | CACCTCATGTTTGAATTCGCC                                                                |
| <b>Variants</b>        | Pre-B                 | CTCTGTACATCGAAATCGC                                                                  |
|                        | F-K211E               | CTGTCCTCGATCAGGCAGCCAC                                                               |
|                        | R-K211E               | CTGCCTGATCGAGGACAGCAAG                                                               |
|                        | F-P28A                | CTGAGCGGGTGCATGGCCGGTGAATCCGCC                                                       |
|                        | R-P28A                | GGCGGATTTACCGGCCATGCACCCGCTCAG                                                       |
|                        | F-D95N                | TCGATACCGCCTGGACCAATGACCAGACCGCCCAGA                                                 |
|                        | R-D95N                | TCTGGGCGGTCTGGTCAATGGTCCAGGCGGTATCGA                                                 |
|                        | F-V88L                | GCGGCCGCGTGCTGTTGGTCGATACCGCCTG                                                      |
|                        | R-V88L                | CAGGCGGTATCGACCAACAGCACGCGGCCGC                                                      |
|                        | F-A233V               | ACTACGCCGCGTCAGTGCGCGGTTTGGTGC                                                       |
|                        | R-A233V               | GCACCAAACGCGCGCACTGACGCGGCGTAGT                                                      |
|                        | F-M154L               | GGGCTGGTTGCGGCGCAA                                                                   |
|                        | R-M154L               | CCGCAACCAGCCCCTCTT                                                                   |

90 Abbreviations: 5' UTR, 5' untranslated regulatory regions that could enhance protein  
 91 expression in the wheat germ system.

92 <sup>a</sup>The 5' UTR sequence is shown in boldface type.

93 <sup>b</sup>PCR here means the conventional PCR to test *bla*<sub>N<sub>DM-1</sub></sub> gene.

94

95 **Figure legends**

96

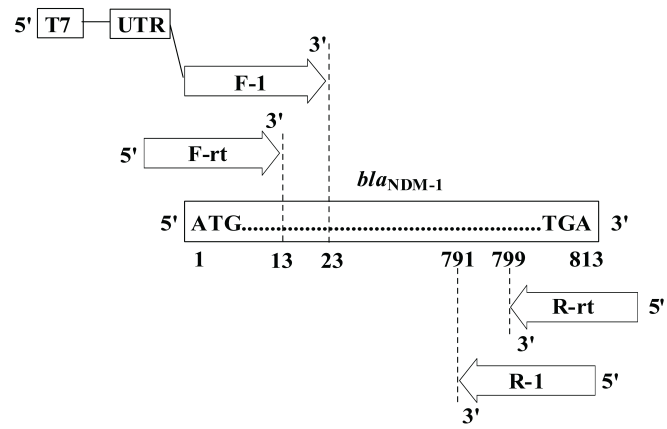

97

98 **FIG S1** Positions of the PCR primers used. The frame was the open reading frame

99 (ORF) of *bla*<sub>NDM-1</sub>.

100

101



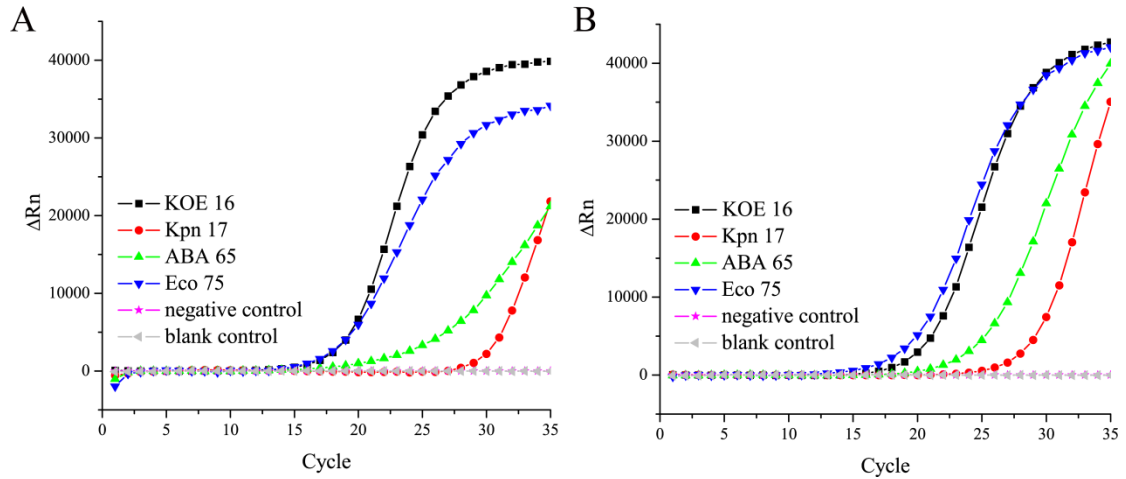

102

103 **FIG S2** Assay of the clinical samples. (A) Typical amplification curves of *bla*<sub>NDM-1</sub>

104 LF-qPCR assay using the plasmid templates extracted from four positive samples. (B)

105 Typical amplification curves of *bla*<sub>NDM-1</sub> LF-qPCR assay using the templates prepared

106 by boiling the four positive samples.
